# Supplementary material for: Integrated analysis of the molecular mechanisms in idiopathic pulmonary fibrosis
Source: PubMed Central journal article supplement (PMC8436110; doi:10.7150/ijms.61309), 2021-08-02
Supplement: ijmsv18p3412s1.pdf [file ijmsv18p3412s1.pdf]

**Table S1.** 203 integrated DEGs identified by the RRA method.

| Name    | Pvalue   | adjPvalue   | logFC       |
|---------|----------|-------------|-------------|
| KRT5    | 5.18E-13 | 1.30E-08    | 3.334316256 |
| SPP1    | 4.68E-12 | 1.17E-07    | 3.661034965 |
| MMP1    | 8.19E-12 | 2.05E-07    | 3.924344785 |
| BPIFB1  | 6.55E-11 | 1.64E-06    | 2.940605982 |
| MMP7    | 1.94E-10 | 4.86E-06    | 3.07289576  |
| SAA1    | 1.02E-09 | 2.56E-05    | 2.617139011 |
| ARMC3   | 1.02E-09 | 2.56E-05    | 2.269738524 |
| CP      | 1.45E-09 | 3.61E-05    | 2.758677127 |
| C6      | 1.67E-09 | 4.17E-05    | 2.195239233 |
| TMEM45A | 3.50E-09 | 8.76E-05    | 2.100187221 |
| PROM1   | 4.05E-09 | 0.000101197 | 2.225330222 |
| KRT15   | 7.02E-09 | 0.000175504 | 2.795022081 |
| SLC27A2 | 1.17E-08 | 0.00029347  | 1.791417492 |
| POSTN   | 2.07E-08 | 0.000517173 | 2.257341476 |
| LTF     | 2.62E-08 | 0.000656179 | 2.014123067 |
| SPAG6   | 2.87E-08 | 0.000716479 | 1.831868685 |
| NEK10   | 2.97E-08 | 0.000741727 | 1.753732284 |
| SPAG17  | 3.57E-08 | 0.000892724 | 1.796397938 |
| EFCAB1  | 3.81E-08 | 0.000952971 | 1.831002628 |

|          |          |             |             |
|----------|----------|-------------|-------------|
| ZBBX     | 3.94E-08 | 0.000984214 | 1.886807043 |
| COL1A1   | 4.26E-08 | 0.00106568  | 2.510028983 |
| MSMB     | 6.48E-08 | 0.001619155 | 2.023246217 |
| S100A2   | 9.32E-08 | 0.002329837 | 2.615997584 |
| RGS22    | 9.46E-08 | 0.002364497 | 1.695244777 |
| SULF1    | 9.70E-08 | 0.00242611  | 1.679568835 |
| C10orf81 | 9.95E-08 | 0.002488562 | 1.959533154 |
| COL3A1   | 1.06E-07 | 0.002651275 | 2.284923031 |
| IL13RA2  | 1.14E-07 | 0.002856443 | 2.22171354  |
| GPR87    | 1.19E-07 | 0.002963381 | 1.690061921 |
| GSTA5    | 1.20E-07 | 0.003007627 | 1.870088398 |
| LRRIQ1   | 1.26E-07 | 0.003148249 | 1.78171828  |
| CXCL13   | 1.32E-07 | 0.003302263 | 1.643472555 |
| COL14A1  | 1.42E-07 | 0.003543795 | 1.821104374 |
| CHST6    | 1.52E-07 | 0.003805496 | 1.901673417 |
| STK33    | 1.54E-07 | 0.003842061 | 1.688098363 |
| KRT17    | 1.70E-07 | 0.004252512 | 2.244639104 |
| CHST9    | 1.78E-07 | 0.004445479 | 1.583804589 |
| CASC1    | 1.86E-07 | 0.004644686 | 1.665233931 |
| COMP     | 1.99E-07 | 0.004986575 | 2.809244178 |
| C20orf85 | 2.10E-07 | 0.005248816 | 2.017281695 |

|          |          |             |             |
|----------|----------|-------------|-------------|
| TSPAN1   | 2.32E-07 | 0.005800544 | 1.873700103 |
| CCDC146  | 2.39E-07 | 0.005984104 | 1.586754195 |
| C6orf118 | 2.49E-07 | 0.006232761 | 1.978938023 |
| ABCA13   | 2.52E-07 | 0.006296118 | 1.626343886 |
| TNS4     | 2.68E-07 | 0.006698537 | 2.09202506  |
| SIX1     | 2.68E-07 | 0.006698537 | 1.804319679 |
| FANK1    | 2.70E-07 | 0.006753241 | 1.622278831 |
| LGALS7   | 2.81E-07 | 0.007017252 | 1.886744682 |
| AGR2     | 2.89E-07 | 0.007234816 | 1.49017822  |
| IGF1     | 3.01E-07 | 0.007521309 | 1.637179713 |
| TMPRSS4  | 3.37E-07 | 0.008431998 | 2.588291168 |
| PIP      | 3.66E-07 | 0.009143736 | 1.94751119  |
| SOX2     | 3.66E-07 | 0.009143736 | 1.899294226 |
| CYP24A1  | 4.20E-07 | 0.01049886  | 1.475402236 |
| WDR78    | 4.59E-07 | 0.011463663 | 1.481549634 |
| BPIFA1   | 4.66E-07 | 0.011661179 | 2.202721465 |
| GSTA2    | 4.85E-07 | 0.012121072 | 1.728444406 |
| WDR63    | 4.87E-07 | 0.012177541 | 1.633135982 |
| AK7      | 5.48E-07 | 0.01370479  | 1.465236548 |
| GSTA1    | 5.84E-07 | 0.014602466 | 1.85835725  |
| MNS1     | 6.15E-07 | 0.015371381 | 1.374303235 |

|           |          |             |             |
|-----------|----------|-------------|-------------|
| SPATA17   | 6.56E-07 | 0.016389436 | 1.284019738 |
| RSPH1     | 6.96E-07 | 0.017401017 | 2.181497225 |
| SERPINB3  | 7.32E-07 | 0.018291708 | 1.996907826 |
| RPGRIP1L  | 7.37E-07 | 0.018433641 | 1.315096822 |
| FAM183A   | 7.70E-07 | 0.019240289 | 1.803087901 |
| MMP11     | 7.95E-07 | 0.019880982 | 1.809650585 |
| WDR16     | 8.21E-07 | 0.020535729 | 1.674799975 |
| SPATA18   | 8.58E-07 | 0.021449698 | 1.284334517 |
| MS4A8B    | 9.03E-07 | 0.022585816 | 1.676566955 |
| RHOV      | 9.03E-07 | 0.022585816 | 1.568333646 |
| C10orf107 | 9.44E-07 | 0.023599265 | 1.316403471 |
| CXCL14    | 9.61E-07 | 0.024025597 | 2.439520281 |
| CAPSL     | 9.91E-07 | 0.024767859 | 2.021786547 |
| SFRP4     | 1.01E-06 | 0.025179331 | 1.197097383 |
| SERPINB4  | 1.08E-06 | 0.027085958 | 1.702627229 |
| C11orf88  | 1.12E-06 | 0.0278896   | 1.905801784 |
| TMEM190   | 1.22E-06 | 0.030395479 | 2.022900204 |
| LCN2      | 1.29E-06 | 0.032146709 | 2.05572187  |
| CFH       | 1.33E-06 | 0.033181582 | 1.606721677 |
| LGALS7B   | 1.43E-06 | 0.035848173 | 1.52676559  |
| DSP       | 1.45E-06 | 0.036152137 | 1.30102551  |

|           |          |             |              |
|-----------|----------|-------------|--------------|
| TSGA10    | 1.46E-06 | 0.036388618 | 1.454016773  |
| DIO2      | 1.47E-06 | 0.036865059 | 1.38966459   |
| CRLF1     | 1.55E-06 | 0.038803175 | 2.339738172  |
| SERPINI2  | 1.57E-06 | 0.039317819 | 1.316757171  |
| FCRL5     | 1.63E-06 | 0.040847022 | 1.633216799  |
| KRT6A     | 1.68E-06 | 0.041916068 | 2.083902065  |
| KLHL13    | 1.91E-06 | 0.047703864 | 1.08891493   |
| ASPN      | 1.93E-06 | 0.048287391 | 1.517505311  |
| LOC728763 | 1.95E-06 | 0.048631886 | 1.546037923  |
| WFDC2     | 1.99E-06 | 0.049816478 | 1.348941629  |
| SLC6A4    | 3.93E-13 | 9.84E-09    | -3.030433224 |
| FCN3      | 1.33E-12 | 3.34E-08    | -3.024984601 |
| PLA2G1B   | 1.64E-12 | 4.10E-08    | -2.538787926 |
| AGER      | 2.87E-12 | 7.16E-08    | -3.169180923 |
| TMEM100   | 6.30E-12 | 1.57E-07    | -2.52605539  |
| ITLN2     | 8.19E-12 | 2.05E-07    | -3.238445033 |
| CA4       | 2.76E-11 | 6.91E-07    | -2.823088885 |
| RTKN2     | 1.24E-10 | 3.10E-06    | -2.518789223 |
| VIPR1     | 2.06E-10 | 5.16E-06    | -2.44711642  |
| PEBP4     | 2.60E-10 | 6.51E-06    | -2.13935559  |
| CACNA2D2  | 4.41E-10 | 1.10E-05    | -1.891838979 |

|            |          |             |              |
|------------|----------|-------------|--------------|
| CPB2       | 5.87E-10 | 1.47E-05    | -2.179657097 |
| CRTAC1     | 7.66E-10 | 1.92E-05    | -2.216108037 |
| FIGF       | 1.15E-09 | 2.88E-05    | -2.171665247 |
| SOSTDC1    | 2.25E-09 | 5.62E-05    | -2.324696043 |
| GPM6A      | 2.84E-09 | 7.09E-05    | -1.850881081 |
| ABCA3      | 2.93E-09 | 7.31E-05    | -1.719145955 |
| CLDN18     | 3.50E-09 | 8.76E-05    | -1.894180043 |
| S100A3     | 5.47E-09 | 0.000136668 | -1.77524046  |
| PLLP       | 5.61E-09 | 0.0001403   | -1.847153827 |
| NDRG4      | 8.35E-09 | 0.000208852 | -1.833583856 |
| LRRC32     | 1.01E-08 | 0.000251296 | -1.494656525 |
| SPOCK2     | 1.17E-08 | 0.00029347  | -1.671463047 |
| ST6GALNAC5 | 1.17E-08 | 0.00029347  | -1.548910315 |
| STX11      | 1.45E-08 | 0.000362659 | -1.605928203 |
| ACVRL1     | 1.45E-08 | 0.000362659 | -1.486433333 |
| CAV1       | 1.81E-08 | 0.000452176 | -1.673330365 |
| NXF3       | 1.84E-08 | 0.000461064 | -1.950048685 |
| SUSD2      | 1.95E-08 | 0.000488514 | -1.599777346 |
| DEFA3      | 2.01E-08 | 0.000503517 | -1.685972541 |
| TNNC1      | 2.23E-08 | 0.000557323 | -1.911044072 |
| EDN1       | 2.23E-08 | 0.000557323 | -1.729231656 |

|          |          |             |              |
|----------|----------|-------------|--------------|
| EMP2     | 2.31E-08 | 0.000578253 | -1.690375083 |
| SH2D3C   | 2.87E-08 | 0.000716479 | -1.364386388 |
| BTNL9    | 4.07E-08 | 0.001016218 | -1.9326139   |
| ESAM     | 4.20E-08 | 0.001048997 | -1.367458175 |
| C11orf9  | 4.39E-08 | 0.001096535 | -1.777195987 |
| FGFBP2   | 4.77E-08 | 0.001193199 | -1.850362343 |
| C1orf198 | 4.83E-08 | 0.001206416 | -1.484263464 |
| GNLY     | 6.30E-08 | 0.001573708 | -1.631308121 |
| SMAD6    | 6.66E-08 | 0.00166558  | -1.456335899 |
| CDH5     | 6.76E-08 | 0.001689163 | -1.432083753 |
| CA2      | 6.85E-08 | 0.001712995 | -1.405533069 |
| DAPK2    | 8.08E-08 | 0.002019097 | -1.551564558 |
| SLCO2A1  | 9.10E-08 | 0.002274289 | -1.303652284 |
| LGI3     | 1.05E-07 | 0.002618186 | -1.172546224 |
| GGTLC1   | 1.06E-07 | 0.002651275 | -1.447751074 |
| SFTA2    | 1.16E-07 | 0.002891762 | -1.421118823 |
| RGS9     | 1.17E-07 | 0.002927407 | -1.373601874 |
| CDH13    | 1.19E-07 | 0.002963381 | -1.429293293 |
| HYAL1    | 1.20E-07 | 0.002999685 | -1.308453348 |
| HPCAL1   | 1.31E-07 | 0.003263241 | -1.36002697  |
| HPGD     | 1.36E-07 | 0.003390941 | -1.599496071 |

|          |          |             |              |
|----------|----------|-------------|--------------|
| FAM107A  | 1.38E-07 | 0.003461861 | -1.699832904 |
| HSD17B6  | 1.55E-07 | 0.003886159 | -1.935979809 |
| S100A12  | 1.94E-07 | 0.004850514 | -1.66227175  |
| ROBO4    | 1.96E-07 | 0.004903022 | -1.326503963 |
| TMEM130  | 2.05E-07 | 0.00511733  | -1.328606955 |
| CLIC5    | 2.10E-07 | 0.005248816 | -1.70023748  |
| SLC39A8  | 2.21E-07 | 0.005520088 | -1.695610112 |
| HIGD1B   | 2.25E-07 | 0.005625162 | -1.479330866 |
| LAMC3    | 2.32E-07 | 0.005800544 | -1.630148682 |
| VEGFA    | 2.35E-07 | 0.005862603 | -1.336027297 |
| CAMP     | 2.44E-07 | 0.006090335 | -1.316008302 |
| SPRY4    | 2.44E-07 | 0.006107483 | -1.309580189 |
| CSF3     | 2.68E-07 | 0.006698537 | -1.675631627 |
| ANXA3    | 3.81E-07 | 0.009535272 | -1.584218509 |
| CYP3A7   | 3.98E-07 | 0.009937819 | -1.531188681 |
| HBEGF    | 4.24E-07 | 0.010592495 | -1.381377502 |
| IL6      | 4.31E-07 | 0.010776561 | -1.880386922 |
| ICAM1    | 4.47E-07 | 0.011167524 | -1.175165537 |
| DNASE1L3 | 4.71E-07 | 0.011765653 | -1.122073405 |
| ZBED2    | 4.85E-07 | 0.012121072 | -1.739924143 |
| CCDC85A  | 4.85E-07 | 0.012121072 | -1.39653053  |

|               |          |             |              |
|---------------|----------|-------------|--------------|
| HTR3C         | 5.04E-07 | 0.012592891 | -1.704810724 |
| SHISA3        | 5.17E-07 | 0.012924253 | -1.3507258   |
| PCDH12        | 6.05E-07 | 0.015136195 | -1.502551985 |
| ANGPTL4       | 6.15E-07 | 0.015371381 | -1.305377084 |
| LEPREL1       | 6.73E-07 | 0.016815022 | -1.277704729 |
| LRRN3         | 7.20E-07 | 0.018010302 | -1.015742031 |
| FOXF1         | 7.49E-07 | 0.018719983 | -1.354875264 |
| KL            | 7.84E-07 | 0.019599052 | -1.123254501 |
| ADRB1         | 7.90E-07 | 0.019748519 | -1.275833036 |
| ANKRD29       | 8.71E-07 | 0.021770436 | -1.333433996 |
| IFI27         | 8.71E-07 | 0.021770436 | -1.340317856 |
| ARC           | 8.76E-07 | 0.021887994 | -1.462089312 |
| EDNRB         | 9.03E-07 | 0.022585816 | -1.360389513 |
| SEC14L4       | 9.10E-07 | 0.022754257 | -1.165271444 |
| GKN2          | 9.24E-07 | 0.023089489 | -1.358076251 |
| IL1RL1        | 9.61E-07 | 0.024025597 | -1.306170473 |
| NMUR1         | 9.79E-07 | 0.024467593 | -1.44729858  |
| AGBL1         | 9.91E-07 | 0.024767859 | -1.932738992 |
| RP11-165H20.1 | 9.91E-07 | 0.024767859 | -1.291253372 |
| IL32          | 1.07E-06 | 0.026649277 | -1.135324606 |
| STXBP6        | 1.07E-06 | 0.026837444 | -1.373975881 |

|          |          |             |              |
|----------|----------|-------------|--------------|
| NECAB1   | 1.07E-06 | 0.026837444 | -1.139500086 |
| ANKRD1   | 1.09E-06 | 0.027216766 | -1.106158085 |
| DLL4     | 1.17E-06 | 0.029174042 | -1.26353449  |
| RND1     | 1.22E-06 | 0.030605634 | -1.307142131 |
| AGTR2    | 1.34E-06 | 0.033403346 | -1.297566824 |
| APOBEC3A | 1.38E-06 | 0.034528887 | -1.360824423 |
| PRX      | 1.40E-06 | 0.034897553 | -1.236816323 |
| PPP1R15A | 1.41E-06 | 0.035217721 | -1.033660707 |
| F11      | 1.47E-06 | 0.036626258 | -1.510522838 |
| WNT3A    | 1.55E-06 | 0.038803175 | -1.613854093 |
| RAMP3    | 1.62E-06 | 0.040589109 | -1.327697429 |
| MME      | 1.85E-06 | 0.04631927  | -1.184443089 |
| LRRC36   | 1.86E-06 | 0.046552693 | -1.377794915 |
| HMGCS2   | 1.87E-06 | 0.04683851  | -1.094848572 |
| KCNMB4   | 1.92E-06 | 0.047994962 | -1.177196004 |
| GRIA1    | 1.99E-06 | 0.049769629 | -1.123019002 |

**Table S2.** 3 differential KEGG functions and pathways by the RRA method.

| Name                           | Pvalue   | adjPvalue   | logFC        |
|--------------------------------|----------|-------------|--------------|
| KEGG_GRAFT_VERSUS_HOST_DISEASE | 5.58E-08 | 1.03E-05    | -0.555014209 |
| KEGG_ALLOGRAFT_REJECTION       | 8.38E-06 | 0.001541696 | -0.470560371 |

KEGG\_TYPE\_I\_DIABETES\_MELLITUS 2.29E-05 0.004212855 -0.40492194

---

**Table S3.** 29 differential GO functions and pathways by the RRA method.

---

| Name                                                                          | Pvalue   | adjPvalue   | logFC       |
|-------------------------------------------------------------------------------|----------|-------------|-------------|
| GO_UTP_METABOLIC_PROCESS                                                      | 2.44E-07 | 0.001672155 | 0.423165069 |
| GO_GTP_BIOSYNTHETIC_PROCESS                                                   | 6.86E-07 | 0.004701429 | 0.405372298 |
| GO_TONIC_SMOOTH_MUSCLE_CONTRACTION                                            | 1.48E-06 | 0.010123888 | 0.462153741 |
| GO_IMP_METABOLIC_PROCESS                                                      | 1.95E-06 | 0.013352293 | 0.525244974 |
| GO_IMMUNOGLOBULIN_COMPLEX                                                     | 2.05E-06 | 0.014009143 | 0.569067182 |
| GO_EXTRACELLULAR_MATRIX_STRUCTURAL_CONSTITUENT_CONFIGURATION_TENSILE_STRENGTH | 2.08E-06 | 0.014264599 | 0.495699962 |
| GO_ALDEHYDE_DEHYDROGENASE_NAD_P_PLUS_ACTIVITY                                 | 3.21E-06 | 0.021978787 | 0.450113222 |
| GO_OLIGOSACCHARYLTRANSFERASE_COMPLEX                                          | 3.67E-06 | 0.025146931 | 0.489046848 |
| GO_OLIGOSACCHARYL_TRANSFERASE_ACTIVITY                                        | 5.26E-06 | 0.036052901 | 0.547721252 |
| GO_EUKARYOTIC_48S_PREINITIATION_COMPLEX                                       | 5.73E-06 | 0.039262836 | 0.41522642  |
| GO_INTRACILIARY_TRANSPORT_PROCESS                                             | 6.03E-06 | 0.041288893 | 0.519770429 |

## ARTICLE\_B

|                                                                            |          |             |              |
|----------------------------------------------------------------------------|----------|-------------|--------------|
| GO_DYNEIN_LIGHT_CHAIN_BINDING                                              | 6.23E-06 | 0.042682489 | 0.538165956  |
| GO_NUCLEOBASE_CONTAINING_SMALL_MOLECULE_INTERCONVERSION                    | 6.33E-06 | 0.04339237  | 0.399181142  |
| GO_CELLULAR_RESPONSE_TO_ALDEHYDE                                           | 6.57E-06 | 0.044979798 | 0.525077862  |
| GO_ANTIGEN_PROCESSING_AND_PRESENTATION_OF_PEPTIDE_ANTIGEN_VIA_MHC_CLASS_II | 3.98E-10 | 2.73E-06    | -0.49290883  |
| GO_POSITIVE_REGULATION_OF_VASCULOGENESIS                                   | 6.22E-09 | 4.26E-05    | -0.46351363  |
| GO_REGULATION_OF_T_HELPER_2_CELL_CYTOKINE_PRODUCTION                       | 8.59E-08 | 0.000588453 | -0.53066833  |
| GO_POSITIVE_REGULATION_OF_NATURAL_KILLER_CELL_MEDIATED_IMMUNITY            | 6.86E-07 | 0.004701429 | -0.447832382 |
| GO_MITOGEN_ACTIVATED_PROTEIN_KINASE_KINASE_BINDING                         | 8.95E-07 | 0.006133853 | -0.542996726 |
| GO_REGULATION_OF_INTERFERON_GAMMA_SECRETION                                | 1.21E-06 | 0.008289945 | -0.458369583 |

|                                                                         |          |             |              |
|-------------------------------------------------------------------------|----------|-------------|--------------|
| GO_T_HELPER_2_CELL_CYTOKINE<br>_PRODUCTION                              | 2.31E-06 | 0.015846419 | -0.429494624 |
| GO_NEGATIVE_REGULATION_OF_<br>NATURAL_KILLER_CELL_MEDIAT<br>ED_IMMUNITY | 2.51E-06 | 0.017202084 | -0.487395367 |
| GO_MHC_PROTEIN_COMPLEX                                                  | 2.68E-06 | 0.018365915 | -0.450654177 |
| GO_POSITIVE_REGULATION_OF_IN<br>TERLEUKIN_5_PRODUCTION                  | 2.94E-06 | 0.020140684 | -0.387928593 |
| GO_T_CELL_TOLERANCE_INDUCTI<br>ON                                       | 2.97E-06 | 0.020312927 | -0.431137134 |
| GO_CD4_POSITIVE_ALPHA_BETA_<br>T_CELL_CYTOKINE_PRODUCTION               | 3.42E-06 | 0.023395722 | -0.376579976 |
| GO_HEMOGLOBIN_COMPLEX                                                   | 4.33E-06 | 0.029686389 | -0.489166865 |
| GO_REGULATION_OF_VASCULOGE<br>NESIS                                     | 4.51E-06 | 0.030919419 | -0.433801651 |
| GO_DENDRITIC_SPINE_HEAD                                                 | 5.83E-06 | 0.039901648 | -0.399383092 |

---
